## P6455

### Differences in cardiac phenotype and natural history of laminopathies with and without neuromuscular presentation

R. Ditaranto<sup>1</sup>, C. Rapezzi<sup>1</sup>, G. Boriani<sup>2</sup>, F. Pasquale<sup>1</sup>, M. Graziosi<sup>1</sup>, G. Vitale<sup>1</sup>, A. Berardini<sup>1</sup>, G. Lanati<sup>1</sup>, A. Corsini<sup>1</sup>, G. Caponetti<sup>1</sup>, G. Lattanzi<sup>3</sup>, L. Potena<sup>1</sup>, M. Ziacchi<sup>1</sup>, O. Leone<sup>1</sup>, E. Biagini<sup>1</sup>

<sup>1</sup>University Hospital Policlinic S. Orsola-Malpighi, Bologna, Italy; <sup>2</sup>University of Modena & Reggio Emilia, Department of Biomedical, Metabolic and Neural Sciences, University of Modena and Reggio Emilia, Modena, Italy; <sup>3</sup>University of Bologna, Italian National Research Council | CNR • Institute of Molecular Genetics IGM Bologna, Bologna, Italy

**Aim:** To look for differences in cardiac phenotype and natural history of patients affected by laminopathy, according to the presence or less of neuromuscular involvement at clinical presentation.

**Methods:** We prospectively analyzed 47 consecutive pts with a genetic diagnosis of laminopathy followed at a single centre between 1994 and 2017. Additionally, reports of clinical and instrumental evaluations before referral at our centre were retrospectively evaluated.

**Results:** Neuromuscular presentation, mainly as Emery-Dreifuss muscular dystrophy (EDMD), was present in 21 (46%) cases (14 LMNA and 7 EMD gene mutations). These pts had symptoms earlier (9 vs 39 years,  $p < 0.001$ ) in life compared to pts without neuromuscular onset (26 LMNA gene mutations), and clinical manifestations anticipated the first evidence of cardiac disease by a mean time of  $15 \pm 8$  years (maximum time gap of 38 years). Despite a similar prevalence of atrial fibrillation/flutter (AF) (71% vs 65%,  $p = 0.758$ ) and atrio-ventricular blocks (48% vs 65%,  $p = 0.250$ ), pts with neuromuscular onset experienced AF and pace-maker implantation at a significantly younger age (27 vs 41 yrs,  $p = 0.015$  and 23 vs 44 yrs,  $p = 0.027$  respectively). Differently a higher prevalence of sinus node dysfunction (33% vs 4%;  $p = 0.015$ ) and atrial paralysis (14% vs 4%;  $p = 0.311$ ) was reported in pts with neuromuscular onset. Prevalence of cardiomyopathy (CMP) (73% vs 33%,  $p = 0.008$ ) and sustained ventricular tachyarrhythmias were higher

among pts with cardiac onset (23% vs 4%,  $p = 0.111$ ) whereas the prevalence of heart transplantations and median age of recipients were similar in the two groups (24% vs 20%,  $p = 1.000$  and 46 vs 43,  $p = 0.592$  years respectively). All pts with neuromuscular onset who received a diagnosis of CMP had a previous history of rhythm disturbance except 2 cases, where a concomitant diagnosis of the 2 disorders was formulated. On the contrary a strict temporal progression from rhythm disturbances to CMP (or viceversa) was not appreciable in the other group: AF and AVBs could precede the diagnosis of CMP be diagnosed at the same time or later.

**Conclusions:** In pts affected by laminopathy neuromuscular involvement, when present, was most often the first clinical manifestation and preceded cardiological involvement, with a long time frame in some cases. Except for sinus node dysfunction, much more frequent in patients with EDMD, a similar prevalence of rhythm disturbances was reported, although pts with neuromuscular clinical onset were younger at diagnosis of AF and at PM implantation. Pts without neuromuscular presentation had a higher prevalence of CMP and ventricular arrhythmias, albeit a similar rate of heart transplantation. In pts with neuromuscular onset, cardiac involvement was characterized by a stepwise progression from rhythm disturbances to CMP, where a strict temporal progression from rhythm disturbances to CMP was not observed in the group of pts without neuromuscular clinical onset.

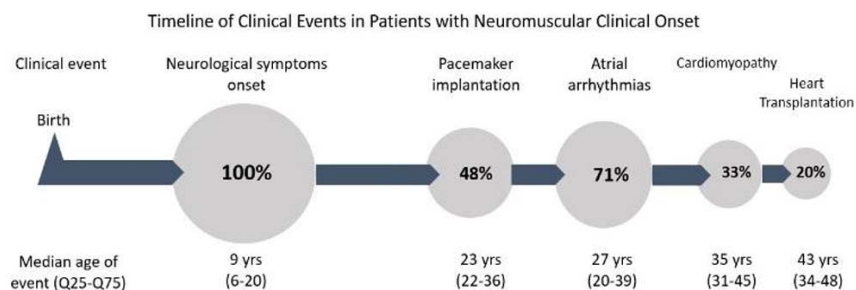

Source: http://academic.oup.com/eurheartj/article-pdf/40/Supplement_1/ehz746.1048/30203951/ehz746.1048.pdf
